# Supplementary material for: Monitoring the dissolution process of metals in the gas phase: reactions of nanoscale Al and Ga metal atom clusters and their relationship to similar metalloid clusters
Source: Royal Society of Chemistry journal article supplement (doi:10.1039/b801224e), 2008-01-01
Supplement: b801224e_9.pdf [file b801224e_9.pdf]

## Electronic Supplementary Information

The supplementary material mainly contains some additional graphical information from the main part in order to visualize the arguments given there.

The corresponding figure captions are:

Fig. 1':  $\text{SiAl}_{14}\text{Cp}^*_6$ : The  $\text{SiAl}_8$  core is surrounded by 6  $\text{AlCp}^*$  moieties.<sup>[1]</sup>

Fig. 2': The metalloid clusters  $[\text{Al}_7\text{R}_6]^-$  ( $\text{R} = \text{N}(\text{SiMe}_3)_2$ ) and  $[\text{Al}_7\text{R}_6]$  ( $\text{R} = \text{N}(\text{SiMe}_3\text{Ph})_2$ ) (only the Al, N and Si atoms are shown).<sup>[2, 3]</sup>

Fig. 3': The  $\text{Al}_{69}$  core of the metalloid clusters  $[\text{Al}_{69}\text{R}_{18}]^{3-}$ , ( $\text{R} = \text{N}(\text{SiMe}_3)_2$ ).<sup>[4]</sup>

Fig. 4': The  $\text{Al}_{12}(\text{AlX}_2)_{10}$  core of the halides  $\text{Al}_{22}\text{X}_{20} \cdot 12\text{D}$  ( $\text{X} = \text{Br}, \text{Cl}$ ;  $\text{D} = \text{THF}$ ).<sup>[5, 6]</sup>

Fig. 5': A central  $\text{Ga}_{12}$  icosahedron is surrounded by a second  $\text{Ga}_{12}$  icosahedron which is encapsulated by a  $\text{Br}_{18}\text{Se}_2$  pentagonal dodecahedron.<sup>[7]</sup>

Fig. 6':  $[\text{Ga}_{12}(\text{GaR} \cdot \text{Br})_{10}]^{2-}$ : A central  $\text{Ga}_{12}$  icosahedron is surrounded by 10 Br-bridged GaR units.<sup>[8]</sup>

Fig. 7':  $\text{Al}_{50}\text{Cp}^*_{12}$ : a core of  $[\text{Al}_8\text{Al}_{30}]$  is surrounded by 12  $\text{AlCp}^*$  moieties.<sup>[9]</sup>

Fig. 8': In the  $[\text{Ga}_{84}\text{R}_{20}]^{4-}$  cluster anion ( $\text{R} = \text{N}(\text{SiMe}_3)_2$ ), 64 naked Ga atoms ( $2 + 32 + 30$ ) are coordinated by 20  $\text{GaN}(\text{SiMe}_3)_2$  moieties.<sup>[10, 11]</sup>

[1] A. Purath, C. Dohmeier, A. Ecker, R. Köppe, H. Krautscheid, H. Schnöckel, R. Ahlrichs, C. Stoermer, J. Friedrich and P. Jutzi, *J. Am. Chem. Soc.* 2000, **122**, 6955-6959.

[2] A. Purath, R. Köppe and H. Schnöckel, *Angew. Chem. Int. Ed.* 1999, **38**, 2926-2928.

[3] P. Yang, R. Köppe, T. Duan, J. Hartig, G. Hadiprono, B. Pilawa, I. Keilhauer and H. Schnöckel, *Angew. Chem. Int. Ed.* 2007, **46**, 3579-3583.

[4] H. Köhnlein, A. Purath, C. Klemp, E. Baum, I. Krossing, G. Stöber and H. Schnöckel, *Inorg. Chem.* 2001, **40**, 4830-4838.

[5] C. Klemp, R. Köppe, E. Weckert and H. Schnöckel, *Angew. Chem. Int. Ed.* 1999, **38**, 1740-1743.

- [6] C. Klemp, M. Bruns, J. Gauss, U. Haeussermann, G. Stößer, L. van Wuellen, M. Jansen and H. Schnöckel, *J. Am. Chem. Soc.* 2001, **123**, 9099-9106.
- [7] J. Hartig, F. Klöwer, J. Rinck, A.-N. Unterreiner and H. Schnöckel, *Angew. Chem. Int. Ed.* 2007, **46**, 6549-6552.
- [8] A. Schnepf, R. Köppe, E. Weckert and H. Schnöckel, *Chemistry - A European Journal* 2004, **10**, 1977-1981.
- [9] J. Vollet, J. R. Hartig and H. Schnöckel, *Angew. Chem. Int. Ed.* 2004, **43**, 3186-3189.
- [10] A. Schnepf and H. Schnöckel, *Angew. Chem. Int. Ed.* 2001, **40**, 712-715.
- [11] D. Bono, O. N. Bakharev, A. Schnepf, J. Hartig, H. Schnöckel and L. J. d. Jongh, *Z. Anorg. Allg. Chem.* 2007, **633**, 2173 - 2177.
