# Supplementary figures and images for: Monitoring the dissolution process of metals in the gas phase: reactions of nanoscale Al and Ga metal atom clusters and their relationship to similar metalloid clusters
Source: Royal Society of Chemistry journal article supplement (doi:10.1039/b801224e), 2008-01-01

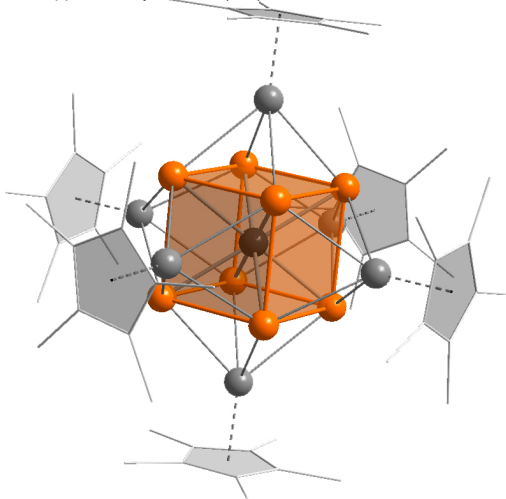

Supplement: b801224e_1.pdf [file b801224e_1.pdf]

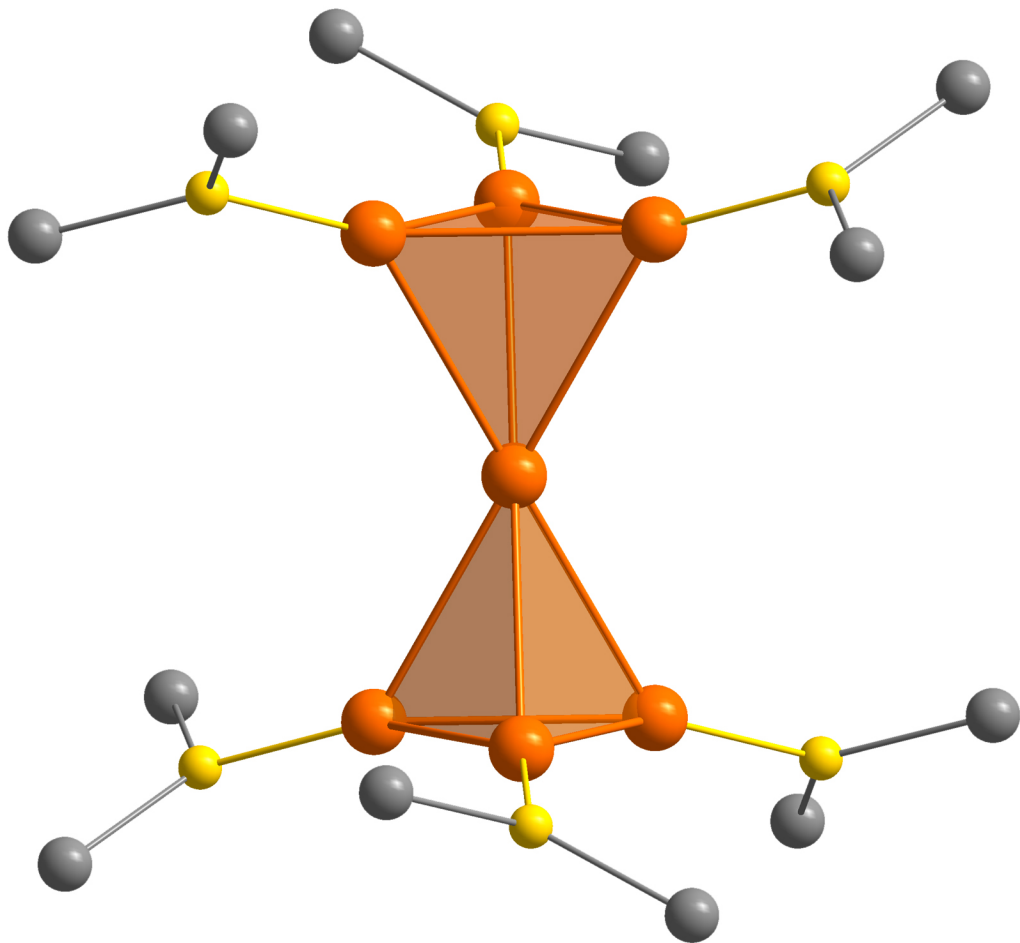

Supplement: b801224e_2.pdf [file b801224e_2.pdf]

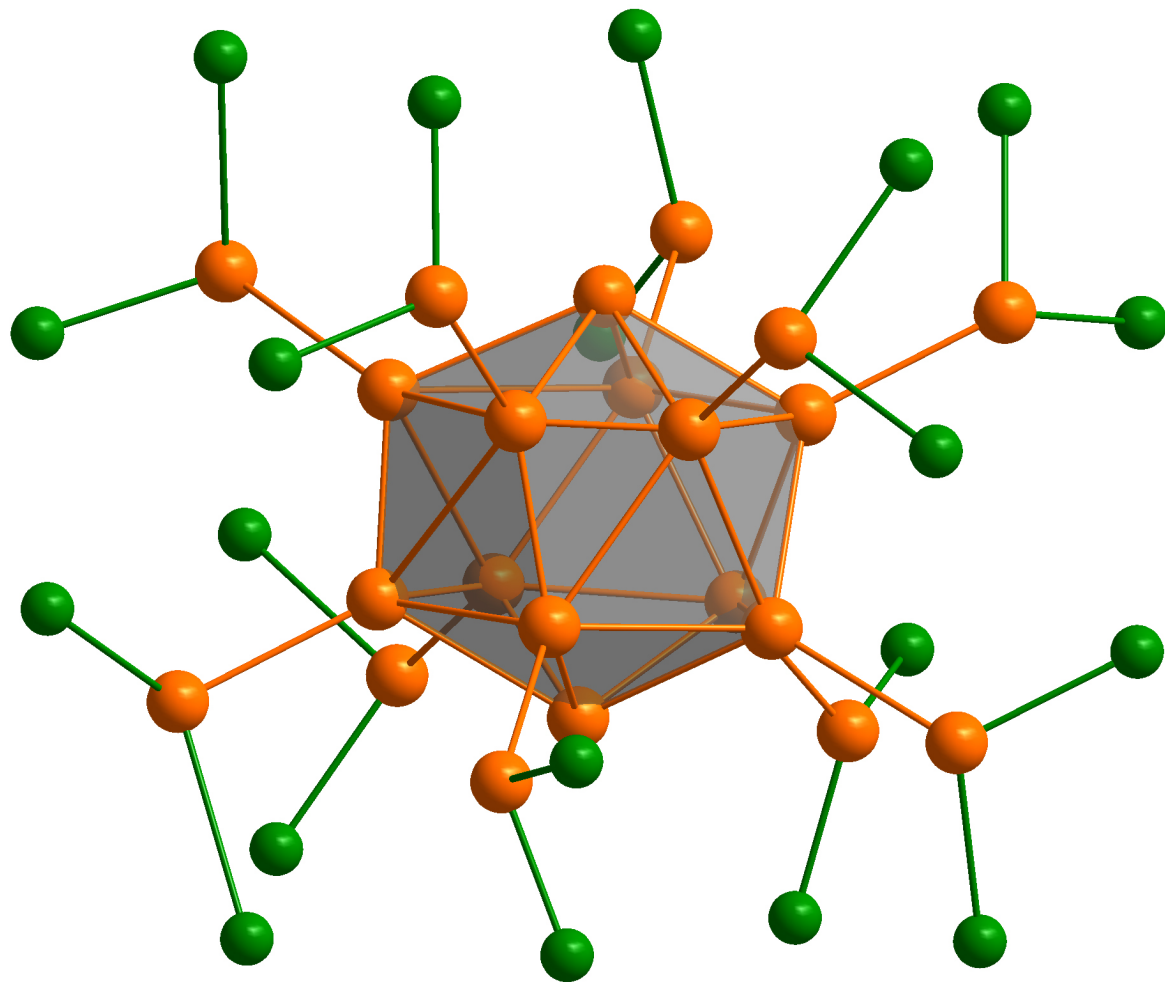

Supplement: b801224e_4.pdf [file b801224e_4.pdf]

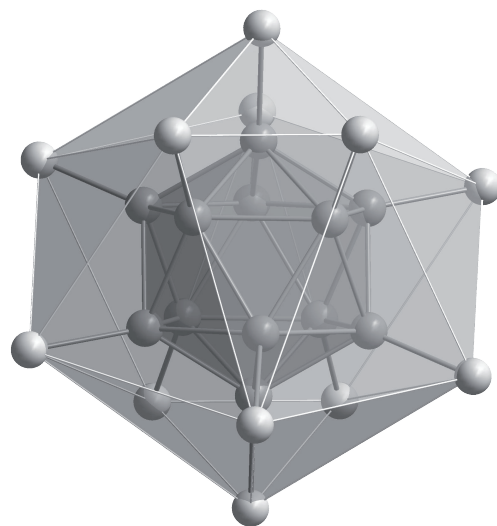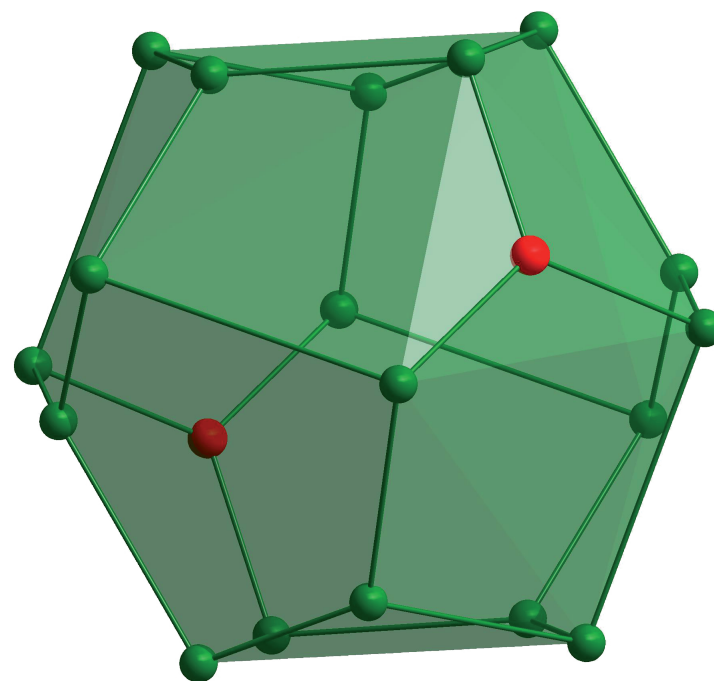

Supplement: b801224e_5.pdf [file b801224e_5.pdf]

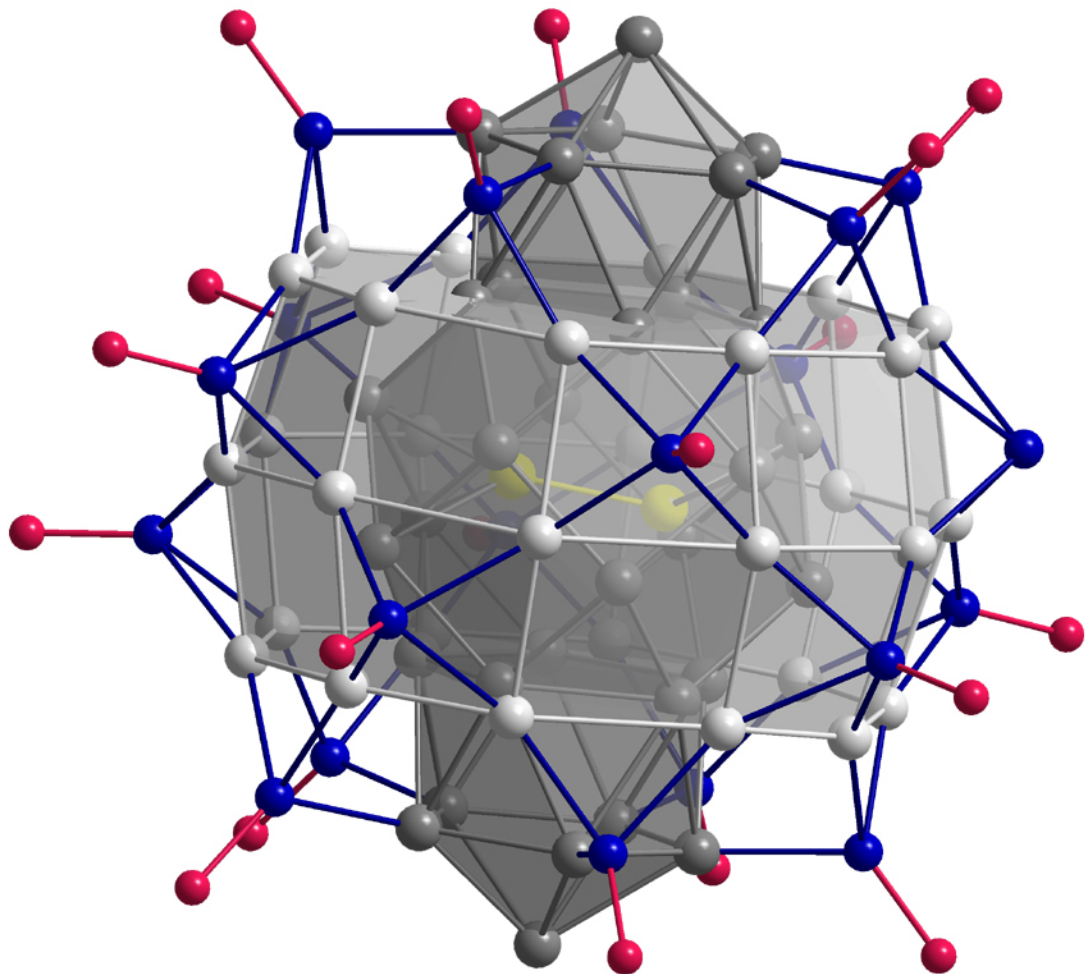

Supplement: b801224e_8.pdf [file b801224e_8.pdf]
